# Supplementary material for: Multifunctional Zn–Ln (Ln = Eu and Tb) heterometallic metal–organic frameworks with highly efficient I2 capture, dye adsorption, luminescence sensing and white-light emission
Source: Royal Society of Chemistry journal article supplement (doi:10.1039/d1dt01968f), 2021-01-01
Supplement: d1dt01968f1.pdf [file d1dt01968f1.pdf]

**Multifunctional Zn-Ln (Ln = Eu and Tb) heterometallic metal-organic frameworks with highly efficient I<sub>2</sub> capture, dye adsorption, luminescence sensing and white light emission**

Wei Gao, Han Wei, Cui-Li Wang, Jie-Ping Liu and Xiu-Mei Zhang\*

**Table S1.** The ICP analysis results of **2-8**.

| Sample                                                           | Feed molar ratio (Eu:Tb) | Measured (Eu:Tb) |
|------------------------------------------------------------------|--------------------------|------------------|
| Zn <sub>3</sub> Eu <sub>0.3</sub> Tb <sub>1.7</sub> ( <b>2</b> ) | 0.3:1.7                  | 0.28:1.72        |
| Zn <sub>3</sub> Eu <sub>0.6</sub> Tb <sub>1.4</sub> ( <b>3</b> ) | 0.6:1.4                  | 0.62:1.38        |
| Zn <sub>3</sub> Eu <sub>0.9</sub> Tb <sub>1.1</sub> ( <b>4</b> ) | 0.9:1.1                  | 0.88:1.2         |
| Zn <sub>3</sub> Eu <sub>1</sub> Tb <sub>1</sub> ( <b>5</b> )     | 1:1                      | 1.01:0.99        |
| Zn <sub>3</sub> Eu <sub>1.2</sub> Tb <sub>0.8</sub> ( <b>6</b> ) | 1.2:0.8                  | 1.2:0.8          |
| Zn <sub>3</sub> Eu <sub>1.5</sub> Tb <sub>0.5</sub> ( <b>7</b> ) | 1.5:0.5                  | 1.51:0.49        |
| Zn <sub>3</sub> Eu <sub>1.8</sub> Tb <sub>0.2</sub> ( <b>8</b> ) | 1.8:0.2                  | 1.78:0.22        |

**Table S2** Selected bond lengths (Å) and angles (°) for Zn<sub>3</sub>Tb<sub>2</sub> (**1**).

|              |           |             |          |
|--------------|-----------|-------------|----------|
| Tb1-O4       | 2.314(7)  | Tb1-O19     | 2.315(6) |
| Tb1-O23A     | 2.321(5)  | Tb1-O3      | 2.324(7) |
| Tb1-O22      | 2.390(6)  | Tb1-O5      | 2.431(6) |
| Tb1-O1B      | 2.447(6)  | Tb1-O2B     | 2.478(6) |
| Tb2-O18      | 2.308(6)  | Tb2-O10C    | 2.308(5) |
| Tb2-O7       | 2.344(6)  | Tb2-O9      | 2.350(6) |
| Tb2-O16      | 2.366(6)  | Tb2-O17     | 2.397(7) |
| Tb2-O14D     | 2.425(6)  | Tb2-O15D    | 2.457(6) |
| Zn1-O12      | 1.951(10) | Zn1-O13     | 1.957(8) |
| Zn1-N9       | 1.967(10) | Zn1-N13     | 1.988(9) |
| Zn2-O21      | 1.906(6)  | Zn2-O24A    | 1.936(6) |
| Zn2-O20      | 1.942(6)  | Zn2-N4E     | 1.988(7) |
| Zn3-O8       | 1.938(6)  | Zn3-O6      | 1.941(7) |
| Zn3-O11C     | 1.977(6)  | Zn3-N19E    | 2.010(8) |
| O4-Tb1-O19   | 96.4(3)   | O4-Tb1-O23A | 157.9(2) |
| O19-Tb1-O23A | 91.9(2)   | O4-Tb1-O3   | 83.5(3)  |
| O19-Tb1-O3   | 147.7(3)  | O23A-Tb1-O3 | 100.2(3) |

|               |          |               |          |
|---------------|----------|---------------|----------|
| O4-Tb1-O22    | 80.7(2)  | O19-Tb1-O22   | 73.5(2)  |
| O23A-Tb1-O22  | 82.1(2)  | O3-Tb1-O22    | 137.5(2) |
| O4-Tb1-O5     | 83.0(3)  | O19-Tb1-O5    | 141.5(2) |
| O23A-Tb1-O5   | 77.8(2)  | O3-Tb1-O5     | 70.7(3)  |
| O22-Tb1-O5    | 68.4(2)  | O4-Tb1-O1B    | 129.2(2) |
| O19-Tb1-O1B   | 75.4(2)  | O23A-Tb1-O1B  | 72.8(2)  |
| O3-Tb1-O1B    | 79.8(3)  | O22-Tb1-O1B   | 138.9(2) |
| O5-Tb1-O1B    | 133.4(2) | O4-Tb1-O2B    | 77.0(2)  |
| O19-Tb1-O2B   | 73.3(2)  | O23A-Tb1-O2B  | 125.1(2) |
| O3-Tb1-O2B    | 75.3(2)  | O22-Tb1-O2B   | 137.2(2) |
| O5-Tb1-O2B    | 142.1(2) | O1B-Tb1-O2B   | 52.3(2)  |
| O18-Tb2-O10C  | 155.7(2) | O18-Tb2-O7    | 103.3(3) |
| O10C-Tb2-O7   | 89.2(2)  | O18-Tb2-O9    | 83.4(2)  |
| O10C-Tb2-O9   | 80.9(2)  | O7-Tb2-O9     | 71.7(2)  |
| O18-Tb2-O16   | 91.6(3)  | O10C-Tb2-O16  | 89.4(2)  |
| O18-Tb2-O17   | 81.0(3)  | O10C-Tb2-O17  | 76.6(2)  |
| O7-Tb2-O17    | 142.3(2) | O9-Tb2-O17    | 71.7(2)  |
| O16-Tb2-O17   | 70.0(3)  | O18-Tb2-O14D  | 76.4(2)  |
| O10C-Tb2-O14D | 127.5(2) | O7-Tb2-O14D   | 73.9(2)  |
| O9-Tb2-O14D   | 134.4(2) | O16-Tb2-O14D  | 80.0(2)  |
| O17-Tb2-O14D  | 141.6(2) | O18-Tb2-O15D  | 128.9(2) |
| O10C-Tb2-O15D | 74.3(2)  | O7-Tb2-O15D   | 74.0(2)  |
| O9-Tb2-O15D   | 137.6(2) | O16-Tb2-O15D  | 72.4(2)  |
| O17-Tb2-O15D  | 132.1(2) | O14D-Tb2-O15D | 53.4(2)  |
| O12-Zn1-O13   | 100.0(4) | O12-Zn1-N9    | 117.8(4) |
| O13-Zn1-N9    | 105.4(4) | O12-Zn1-N13   | 106.5(4) |
| O13-Zn1-N13   | 111.8(4) | N9-Zn1-N13    | 114.3(4) |
| O21-Zn2-O24A  | 120.6(3) | O21-Zn2-O20   | 113.8(3) |
| O24A-Zn2-O20  | 112.1(3) | O21-Zn2-N4E   | 99.1(3)  |
| O24A-Zn2-N4E  | 107.4(3) | O20-Zn2-N4E   | 100.5(3) |
| O8-Zn3-O6     | 108.4(3) | O8-Zn3-O11C   | 132.0(3) |
| O6-Zn3-O11C   | 109.0(3) | O8-Zn3-N19E   | 103.4(3) |
| O6-Zn3-N19E   | 103.3(3) | O11C-Zn3-N19E | 96.2(3)  |

Symmetry codes: A:  $x-1/2, -y+3/2, -z+1$ ; B:  $x-1, y, z$ ; C:  $x+1/2, -y+3/2, -z+2$ ; D:  $x+1, y, z$ ; E:  $-x+1, y-1/2, -z+3/2$ .

**Table S3** Selected bond lengths (Å) and angles (°) for Zn<sub>3</sub>Eu<sub>2</sub> (**9**).

|          |          |         |          |
|----------|----------|---------|----------|
| Eu1-O19  | 2.336(6) | Eu1-O4  | 2.337(6) |
| Eu1-O23A | 2.339(5) | Eu1-O3  | 2.349(6) |
| Eu1-O22  | 2.406(5) | Eu1-O5  | 2.448(6) |
| Eu1-O1B  | 2.466(6) | Eu1-O2B | 2.494(5) |
| Eu2-O10C | 2.328(5) | Eu2-O18 | 2.334(6) |
| Eu2-O7   | 2.367(6) | Eu2-O9  | 2.375(5) |
| Eu2-O16  | 2.389(5) | Eu2-O17 | 2.416(7) |

|              |           |               |            |
|--------------|-----------|---------------|------------|
| Eu2-O14D     | 2.449(6)  | Eu2-O15D      | 2.472(5)   |
| Zn1-O12      | 1.944(8)  | Zn1-O13       | 1.951(8)   |
| Zn1-N9       | 1.965(8)  | Zn1-N13       | 1.969(8)   |
| Zn2-O21      | 1.910(6)  | Zn2-O24A      | 1.938(6)   |
| Zn2-O20      | 1.944(6)  | Zn2-N4E       | 2.001(6)   |
| Zn3-O6       | 1.940(6)  | Zn3-O8        | 1.948(5)   |
| Zn3-O11C     | 1.978(5)  | Zn3-N19E      | 2.011(7)   |
| O19-Eu1-O4   | 96.9(2)   | O19-Eu1-O23A  | 91.1(2)    |
| O4-Eu1-O23A  | 157.9(2)  | O19-Eu1-O3    | 148.0(2)   |
| O4-Eu1-O3    | 83.4(3)   | O23A-Eu1-O3   | 100.5(2)   |
| O19-Eu1-O22  | 73.27(19) | O4-Eu1-O22    | 81.0(2)    |
| O23A-Eu1-O22 | 81.63(19) | O3-Eu1-O22    | 137.7(2)   |
| O19-Eu1-O5   | 141.3(2)  | O4-Eu1-O5     | 70.7(2)    |
| O23A-Eu1-O5  | 77.8(2)   | O3-Eu1-O5     | 70.7(2)    |
| O22-Eu1-O5   | 68.5(2)   | O19-Eu1-O1B   | 75.0(2)    |
| O4-Eu1-O1B   | 128.9(2)  | O23A-Eu1-O1B  | 73.1(2)    |
| O3-Eu1-O1B   | 80.0(2)   | O22-Eu1-O1B   | 138.6(2)   |
| O5-Eu1-O1B   | 133.6(2)  | O19-Eu1-O2B   | 73.27(19)  |
| O4-Eu1-O2B   | 77.3(2)   | O23A-Eu1-O2B  | 124.79(19) |
| O3-Eu1-O2B   | 75.6(2)   | O22-Eu1-O2B   | 137.21(18) |
| O5-Eu1-O2B   | 142.6(2)  | O1B-Eu1-O2B   | 51.85(19)  |
| O10C-Eu2-O18 | 156.1(2)  | O10C-Eu2-O7   | 88.6(2)    |
| O18-Eu2-O7   | 103.3(2)  | O10C-Eu2-O9   | 80.0(2)    |
| O18-Eu2-O9   | 84.2(2)   | O7-Eu2-O9     | 71.3(2)    |
| O10C-Eu2-O16 | 89.0(2)   | O18-Eu2-O16   | 92.2(3)    |
| O7-Eu2-O16   | 146.0(2)  | O9-Eu2-O16    | 141.2(2)   |
| O10C-Eu2-O17 | 76.7(2)   | O18-Eu2-O17   | 81.2(3)    |
| O7-Eu2-O17   | 141.8(2)  | O9-Eu2-O17    | 71.5(2)    |
| O16-Eu2-O17  | 69.8(2)   | O10C-Eu2-O14D | 127.36(18) |
| O18-Eu2-O14D | 76.3(2)   | O7-Eu2-O14D   | 74.4(2)    |
| O9-Eu2-O14D  | 135.1(2)  | O16-Eu2-O14D  | 80.3(2)    |
| O17-Eu2-O14D | 141.7(2)  | O10C-Eu2-O15D | 74.54(19)  |
| O18-Eu2-O15D | 128.4(2)  | O7-Eu2-O15D   | 74.6(2)    |
| O9-Eu2-O15D  | 137.5(2)  | O16-Eu2-O15D  | 72.1(2)    |
| O17-Eu2-O15D | 132.1(2)  | O14D-Eu2-O15D | 53.05(18)  |
| O12-Zn1-O13  | 100.5(4)  | O12-Zn1-N9    | 118.4(4)   |
| O13-Zn1-N9   | 104.8(4)  | O12-Zn1-N13   | 106.5(4)   |
| O13-Zn1-N13  | 112.0(4)  | N9-Zn1-N13    | 113.9(4)   |
| O21-Zn2-O24A | 121.3(2)  | O21-Zn2-O20   | 113.4(3)   |
| O24A-Zn2-O20 | 112.3(3)  | O21-Zn2-N4E   | 99.2(2)    |
| O24A-Zn2-N4E | 106.9(3)  | O20-Zn2-N4E   | 100.2(3)   |
| O6-Zn3-O8    | 108.5(3)  | O6-Zn3-O11C   | 109.2(3)   |
| O8-Zn3-O11C  | 132.5(2)  | O6-Zn3-N19E   | 103.0(3)   |

O8-Zn3-N19E                      103.0(2)                      O11C-Zn3-N19E                      95.7(3)  
Symmetry codes: A: x+1/2, -y+1/2, -z+1; B: x+1, y, z; C: x-1/2, -y+1/2, -z; D: x-1, y, z; E: -x+1, y+1/2, z+1/2.

---

Table S4. CIE color coordinate of  $\text{Zn}_3\text{Eu}_x\text{Tb}_{2-x}$  (**1-9**).

| $\lambda=298$ nm                                         | CIE coordinate |      |
|----------------------------------------------------------|----------------|------|
| $\text{Zn}_3\text{Eu}_x\text{Tb}_{2-x}$ ( <b>1-9</b> )   | x              | y    |
| $\text{Zn}_3\text{Tb}_2$ ( <b>1</b> )                    | 0.27           | 0.46 |
| $\text{Zn}_3\text{Eu}_{0.3}\text{Tb}_{1.7}$ ( <b>2</b> ) | 0.28           | 0.45 |
| $\text{Zn}_3\text{Eu}_{0.6}\text{Tb}_{1.4}$ ( <b>3</b> ) | 0.30           | 0.44 |
| $\text{Zn}_3\text{Eu}_{0.9}\text{Tb}_{1.1}$ ( <b>4</b> ) | 0.29           | 0.38 |
| $\text{Zn}_3\text{Eu}_1\text{Tb}_1$ ( <b>5</b> )         | 0.31           | 0.37 |
| $\text{Zn}_3\text{Eu}_{1.2}\text{Tb}_{0.8}$ ( <b>6</b> ) | 0.31           | 0.35 |
| $\text{Zn}_3\text{Eu}_{1.5}\text{Tb}_{0.5}$ ( <b>7</b> ) | 0.33           | 0.33 |
| $\text{Zn}_3\text{Eu}_{1.8}\text{Tb}_{0.2}$ ( <b>8</b> ) | 0.35           | 0.28 |
| $\text{Zn}_3\text{Eu}_2$ ( <b>9</b> )                    | 0.36           | 0.24 |

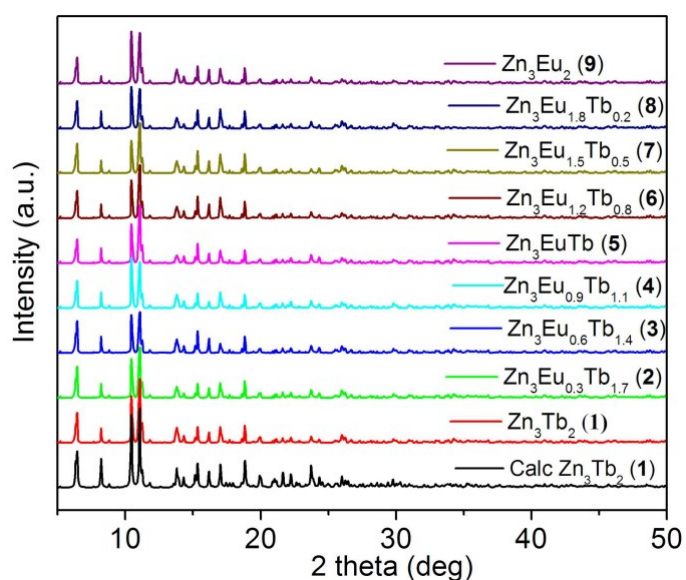

**Fig. S1** PXRD patterns of  $\text{Zn}_3\text{Eu}_x\text{Tb}_{2-x}$  (**1-9**) (black line) simulated from the single-crystal data, (other color lines) for the as-synthesized sample.

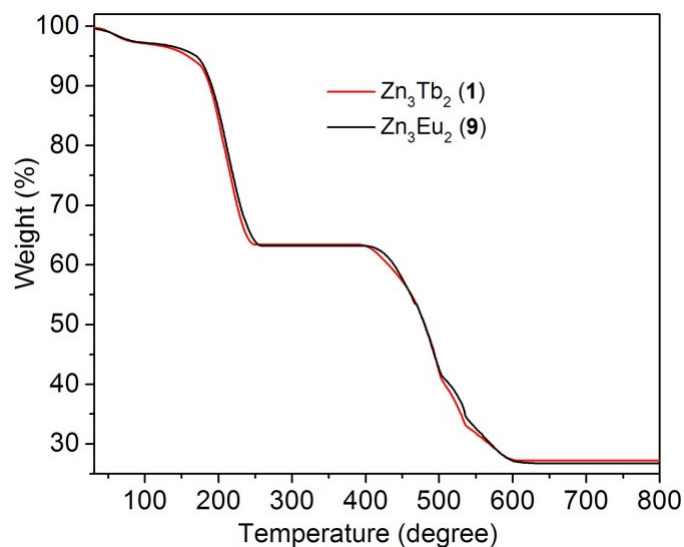

**Fig. S2** TGA plots of  $\text{Zn}_3\text{Tb}_2$  (1) and  $\text{Zn}_3\text{Eu}_2$  (9) under air environment.

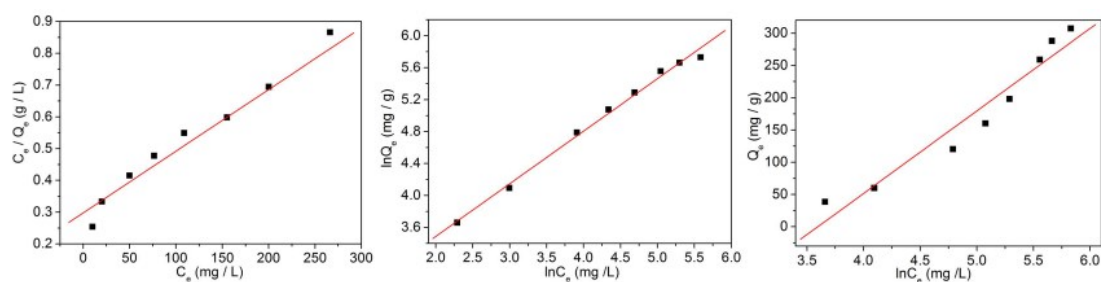

**Fig. S3** Plots of the fitting of the  $\text{I}_2$  adsorption on  $\text{Zn}_3\text{Tb}_2$  (1) experimental data with Langmuir isotherm (left), Freundlich (middle) and Temkin isotherm models (right).

**Table S5** Parameters of the adsorption of  $\text{I}_2$  on  $\text{Zn}_3\text{Tb}_2$  (1).

| Models     | Parameters                                                                | $\text{I}_2$ |
|------------|---------------------------------------------------------------------------|--------------|
| Langmuir   | $q_m$ ( $\text{mg}\cdot\text{g}^{-1}$ )                                   | 515.46       |
|            | $b$ ( $\text{L}\cdot\text{mg}^{-1}$ )                                     | 0.0065       |
|            | $R^2$                                                                     | 0.9817       |
| Freundlich | $n$                                                                       | 1.49         |
|            | $kF$ ( $\text{mg}\cdot\text{g}^{-1}(\text{L}\cdot\text{mg}^{-1})^{1/n}$ ) | 8.356        |
|            | $R^2$                                                                     | 0.996        |
| Tempkin    | $A$ ( $\text{L}\cdot\text{g}^{-1}$ )                                      | 0.023        |
|            | $B$                                                                       | 127.85       |
|            | $R^2$                                                                     | 0.9708       |

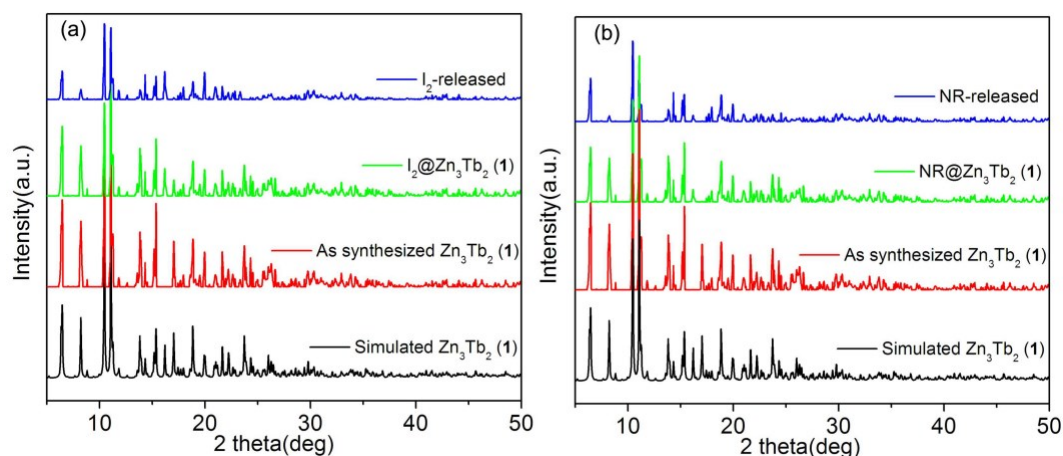

**Fig. S4** The PXRD patterns of  $\text{Zn}_3\text{Tb}_2$  (**1**) after the absorption and desorption of  $\text{I}_2$  (a) and NR (b).

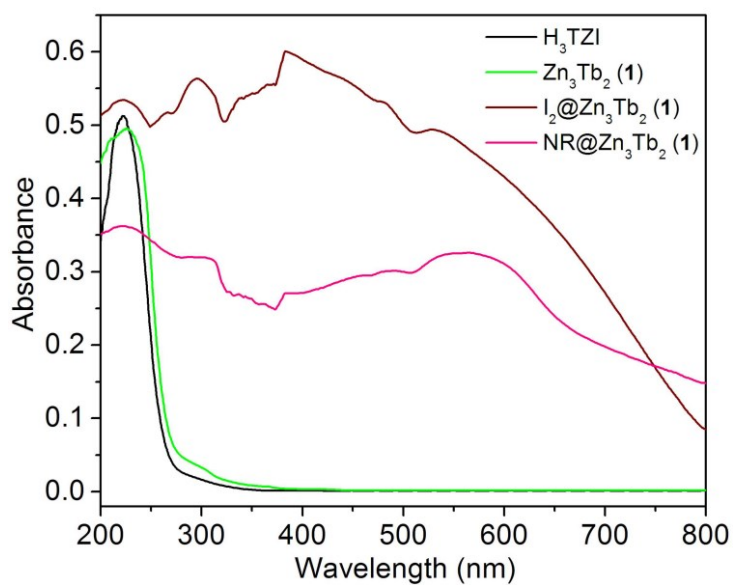

**Fig. S5** Solid-state UV-vis spectra of free  $\text{H}_3\text{TZI}$  ligand,  $\text{Zn}_3\text{Tb}_2$  (**1**), iodine-loaded samples and NR-loaded samples.

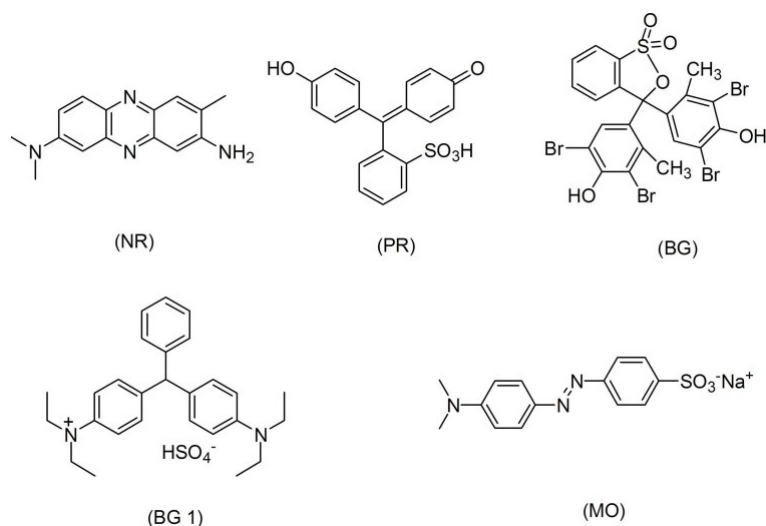

**Fig. S6** The structures of the selected dye molecules.

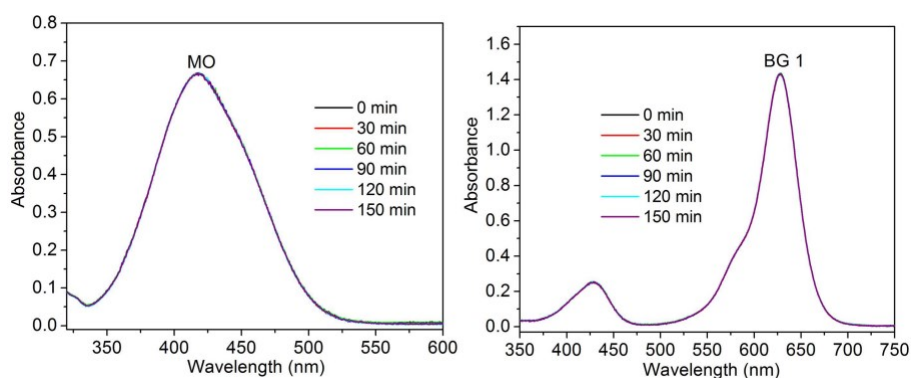

**Fig. S7** UV-vis spectra of EtOH solutions of MO and BG 1 in the presence of  $Zn_3Tb_2$  (1) with time.

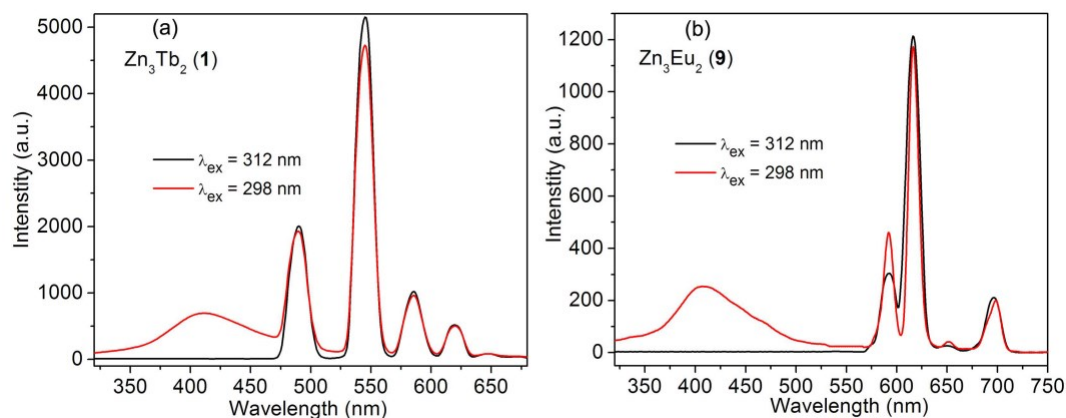

**Fig. S8** Solid state emission spectra of  $Zn_3Tb_2$  (1) (a) and  $Zn_3Eu_2$  (9) (b) at room temperature.

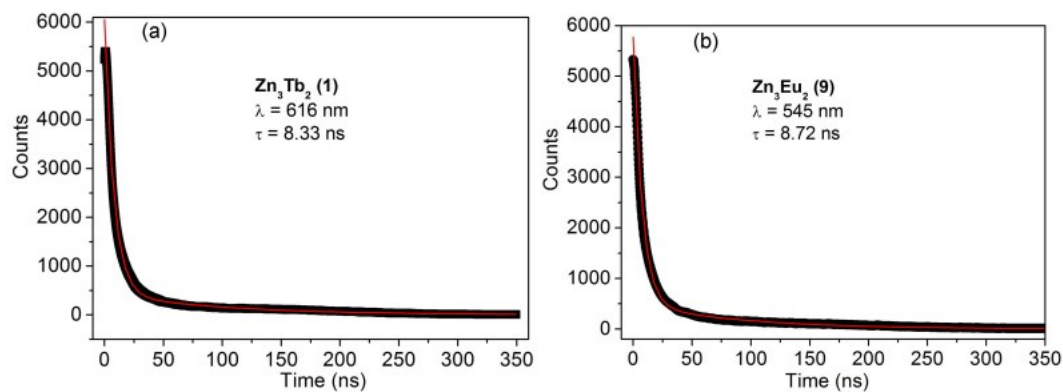

**Fig. S9** Decay curves and luminescence lifetime of  $Zn_3Tb_2$  (1) (a) and  $Zn_3Eu_2$  (9).

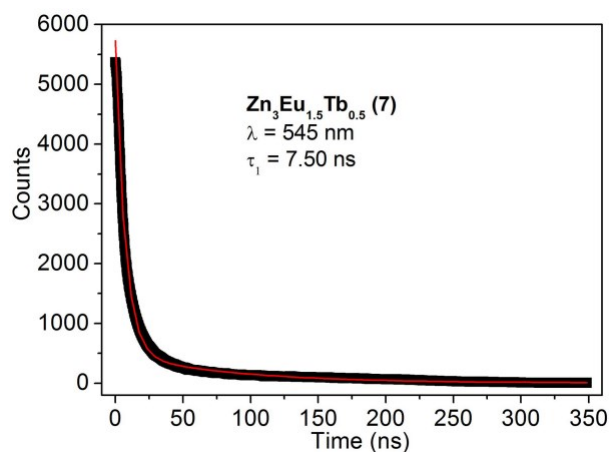

**Fig. S10** Decay curves and luminescence lifetime of  $Zn_3Eu_{1.5}Tb_{0.5}$  (7).

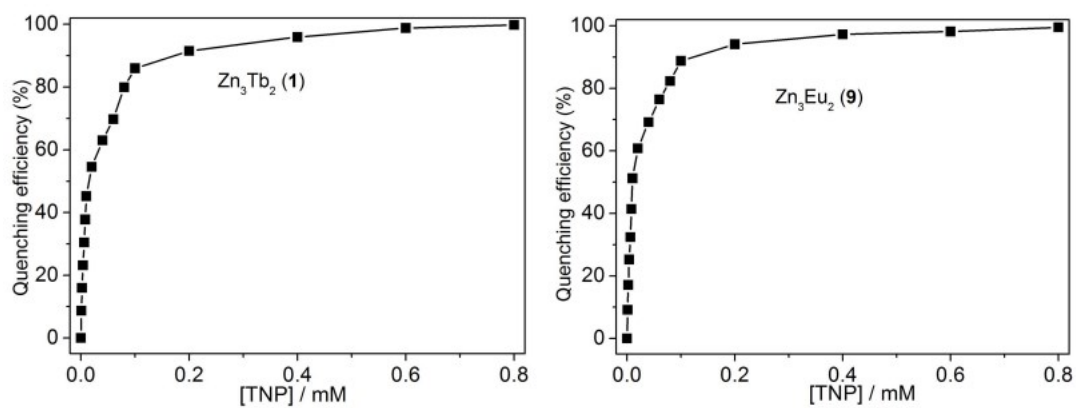

**Fig. S11** Dependence of the quenching efficiency on the concentration of TNP.



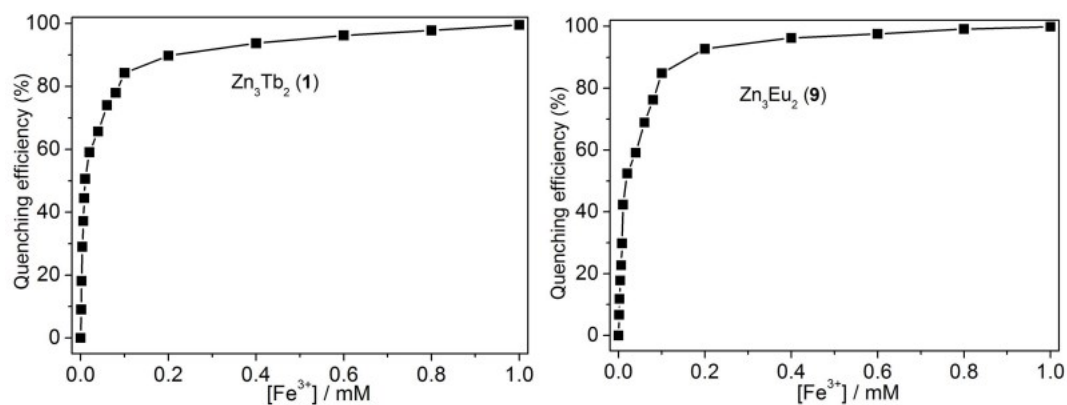

**Fig. S12** Dependence of the quenching efficiency on the concentration of  $Fe^{3+}$  ions.

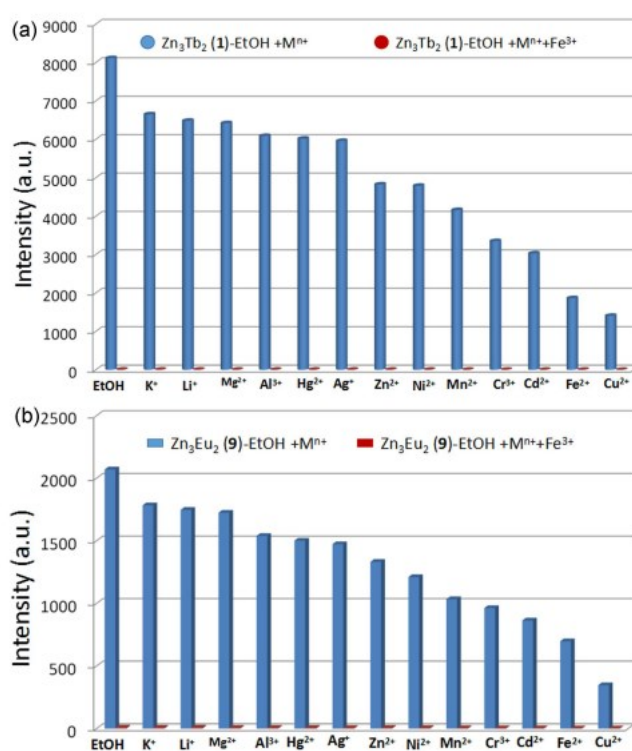

**Fig. S13** The luminescent intensity of  $Zn_3Tb_2$  (1) (a) and  $Zn_3Eu_2$  (9) (b) on  $Fe^{3+}$  sensing.

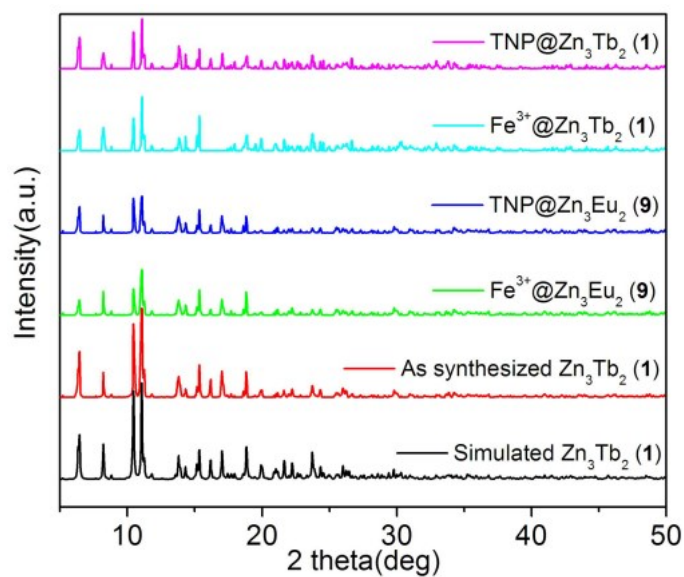

**Fig. S14** PXRD patterns of Zn<sub>3</sub>Tb<sub>2</sub> (1) and Zn<sub>3</sub>Eu<sub>2</sub> (9) immersed in TNP and Fe<sup>3+</sup> solution.

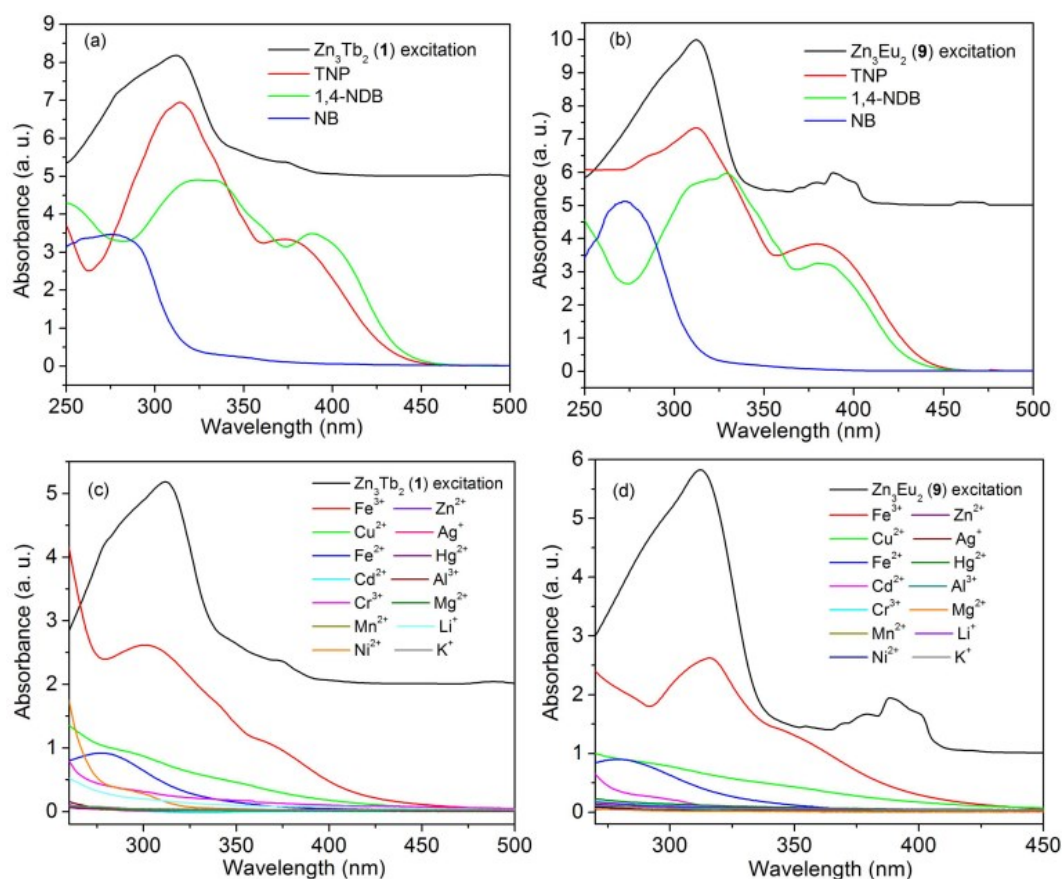

**Fig. S15** UV-vis adsorption spectrum of TNP, 1,4-NDB, NB and M(NO<sub>3</sub>)<sub>x</sub> EtOH solutions and the excitation spectrum of Zn<sub>3</sub>Tb<sub>2</sub> (1) (a, c) and Zn<sub>3</sub>Eu<sub>2</sub> (9) (b, d).

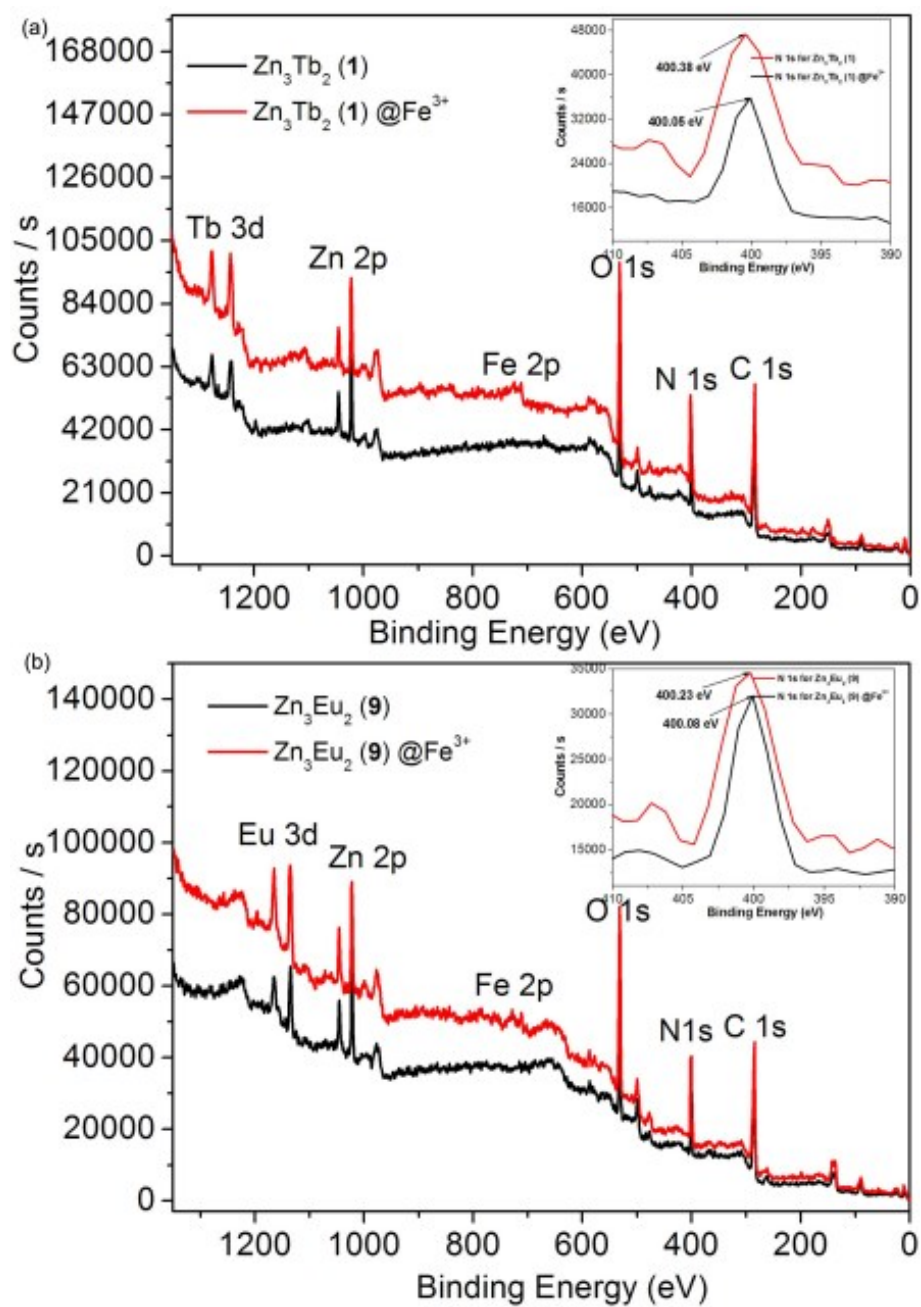

**Fig. S16** Comparison of the XPS spectra of  $\text{Zn}_3\text{Tb}_2$  (1) (a) and  $\text{Zn}_3\text{Eu}_2$  (9) (b) before and after treatment with  $\text{Fe}^{3+}$  ions. Inset: picture showing the spectra of N 1s.
